# Supplementary material for: Cumulative incidence of SARS-CoV-2 infection and associated risk factors among frontline health care workers in Paris: the SEROCOV cohort study
Source: Sci Rep. 2022 May 4;12:7211. doi: 10.1038/s41598-022-10945-y (PMC9068621; doi:10.1038/s41598-022-10945-y)
Supplement: Supplementary file 2 — Supplementary Information 2. [file 41598_2022_10945_MOESM2_ESM.pdf]

**Cahier vierge**  
**Protocole**  
**SEROCOV**  
**Version 47**

19/05/2020 11:03

# Visite d'inclusion

## Identification

SEROCOV

|                                   |                                                              |
|-----------------------------------|--------------------------------------------------------------|
| Nom (première lettre)             | _                                                            |
| Prénom (première lettre)          | _                                                            |
| Numéro du centre                  | _ _ _                                                        |
| Nom de centre                     | .....                                                        |
| Référence du patient              | .....                                                        |
| Nom de l'investigateur            | .....                                                        |
| Age                               | _ _ _ _                                                      |
| Sexe                              | <input type="radio"/> Masculin <input type="radio"/> Féminin |
| Date de signature de consentement | _ _ / _ _ / _ _ _ _                                          |
| Date d'inclusion                  | _ _ / _ _ / _ _ _ _                                          |

Critères d'inclusion

1. Personnel médical ou paramédical permanent dans l'un des services participants. ☐ Oui ☐ Non

On entend ici par permanents les personnels du service,  
qu'ils soient sur des postes pérennes ou non (donc y compris internes, chefs de cliniques...) par opposition aux personnels d'autres services qui y prennent des gardes ponctuellement.

2. Consentement écrit ☐ Oui ☐ Non

3. Personnel bénéficiaire d'un régime de sécurité sociale ☐ Oui ☐ Non

Si l'un des items ci-dessus est à « Non », le participant ne peut être inclus dans l'étude

Critères de non inclusion

1. Personnel sans activité dans le service concerné pendant la période d'inclusion ☐ Oui ☐ Non

2. Personnel non permanent (prise occasionnelle de gardes, personnel du pool de l'hôpital, intérimaires), personnel administratif, personnel technique des services participants ☐ Oui ☐ Non

3. Personnel faisant l'objet d'une mesure de protection de justice ☐ Oui ☐ Non

Si l'un des items ci-dessus est à « Oui », le participant ne peut être inclus dans l'étude

# Visite d'inclusion (Suite)

## Données sociodémographiques

PM

- ☐ Interne/Externe
- ☐ CCA/AHU
- ☐ PA
- ☐ PHC
- ☐ PH
- ☐ MCU-PH
- ☐ PUPH

PNM

- ☐ AS
- ☐ IDE
- ☐ Cadre
- ☐ KINE
- ☐ Autre profession PNM

Préciser

.....

Horaires de travail

- ☐ Jour
- ☐ Garde
- ☐ Nuit
- ☐ Mixte

Nombre de mois d'exercice dans le service

|\_|\_|\_|

Nombre de mois d'exercice dans le métier

|\_|\_|\_|

Prélèvement sanguin veineux

- ☐ Fait
- ☐ Non fait

Remise d'un carnet d'auto-surveillance hebdomadaire

- ☐ Oui
- ☐ Non

# Visite intermédiaire

## Visite Intermédiaire

Durant sa participation à l'étude, le personnel soignant a-t-il développé des symptômes significatifs (= entraînant une atteinte/ un changement de sa qualité de vie) de syndrome viral clinique aigu ?

☐ Oui ☐ Non

1 - A-t-il contacté l'investigateur ?

1 - A-t-il contacté l'investigateur ? ☐ Oui ☐ Non

A quelle date |\_|\_|/|\_|\_|/|\_|\_|\_|\_|

2 - Préciser le type de symptômes

- Signes généraux
- ☐ Fièvre (> 38°C)
  - ☐ Courbatures
  - ☐ Frissons
  - ☐ Sueurs importantes
  - ☐ Céphalées
  - ☐ Perte du goût (agueusie)
  - ☐ Perte de l'odorat (anosmie)

- Respiratoires
- ☐ Toux
  - ☐ Douleur de gorge
  - ☐ Expectoration
  - ☐ Dyspnée

- Digestifs
- ☐ Nausées
  - ☐ Vomissements
  - ☐ Diarrhée
  - ☐ Douleur abdominale

3 - Préciser la réalisation du prélèvement intermédiaire (10 jours après le début des symptômes)

Prélèvement sanguin veineux ☐ Fait ☐ Non Fait

Si fait, date |\_|\_|/|\_|\_|/|\_|\_|\_|\_|

Diagnostic posé .....

Prélèvement respiratoire virocult réalisé ☐ Fait ☐ Non Fait

Si fait, date |\_|\_|/|\_|\_|/|\_|\_|\_|\_|

Résultat .....

Visite de suivi M1

| Visite de suivi M1                                             |                                                           |
|----------------------------------------------------------------|-----------------------------------------------------------|
| Date                                                           | _ _ / _ _ / _ _ _ _                                       |
| Prélèvement sanguin veineux                                    | <input type="radio"/> Fait <input type="radio"/> Non Fait |
| Si fait, date                                                  | _ _ / _ _ / _ _ _ _                                       |
| Raison                                                         | .....                                                     |
| Avez-vous eue des symptômes avant la visite d'inclusion (J1) ? | <input type="radio"/> Oui <input type="radio"/> Non       |
| Quels ont été vos symptômes ?                                  | .....                                                     |

Visite de fin d'étude M3

| Visite de fin d'étude                                                                                                                                                                               |                                                                                                                                                                                                                                                          |
|-----------------------------------------------------------------------------------------------------------------------------------------------------------------------------------------------------|----------------------------------------------------------------------------------------------------------------------------------------------------------------------------------------------------------------------------------------------------------|
| Date                                                                                                                                                                                                | _ _ / _ _ / _ _ _ _                                                                                                                                                                                                                                      |
| Pendant les 3 derniers mois, avez-vous été absents ?                                                                                                                                                | <input type="radio"/> Oui <input type="radio"/> Non                                                                                                                                                                                                      |
| Si oui, combien de jours (>= 7 jours) :                                                                                                                                                             | _ _  Jours                                                                                                                                                                                                                                               |
| Prélèvement sanguin veineux :                                                                                                                                                                       | <input type="radio"/> Fait <input type="radio"/> Non Fait                                                                                                                                                                                                |
| Récupération du carnet d'auto-surveillance :                                                                                                                                                        | <input type="radio"/> Oui <input type="radio"/> Non                                                                                                                                                                                                      |
| Carnet perdu                                                                                                                                                                                        | <input type="radio"/> Oui <input type="radio"/> Non                                                                                                                                                                                                      |
| Collecte des signes en rétrospectif                                                                                                                                                                 | <input type="radio"/> Oui <input type="radio"/> Non                                                                                                                                                                                                      |
| <b>Préciser le type de symptômes :</b>                                                                                                                                                              |                                                                                                                                                                                                                                                          |
| Signes généraux                                                                                                                                                                                     | <div><input type="checkbox"/> Fièvre (&gt; 38°C)</div> <div><input type="checkbox"/> Courbatures</div> <div><input type="checkbox"/> Frissons</div> <div><input type="checkbox"/> Sueurs importantes</div> <div><input type="checkbox"/> Céphalées</div> |
| Respiratoires                                                                                                                                                                                       | <div><input type="checkbox"/> Toux</div> <div><input type="checkbox"/> Douleur de gorge</div> <div><input type="checkbox"/> Expectoration</div> <div><input type="checkbox"/> Dyspnée</div>                                                              |
| Digestifs                                                                                                                                                                                           | <div><input type="checkbox"/> Nausées</div> <div><input type="checkbox"/> Vomissements</div> <div><input type="checkbox"/> Diarrhée</div> <div><input type="checkbox"/> Douleur abdominale</div>                                                         |
| <b>Application des mesures de Protection recommandées :</b>                                                                                                                                         |                                                                                                                                                                                                                                                          |
| En moyenne, durant les 3 mois de l'étude, sur une échelle de 0 à 5, comment qualifieriez-vous votre pratique concernant les mesures de protection individuelles : (0= jamais à 5= systématiquement) |                                                                                                                                                                                                                                                          |
| Port d'un masque chirurgical                                                                                                                                                                        | _  (0-5)                                                                                                                                                                                                                                                 |
| Port d'un masque FFP2 pour réaliser les prélèvements naso-pharyngés (tout patient)                                                                                                                  | _  (0-5)                                                                                                                                                                                                                                                 |
| Port d'un masque FFP2 pour la prise en charge d'un cas confirmé COVID-19                                                                                                                            | _  (0-5)                                                                                                                                                                                                                                                 |
| Si port d'un masque (chirurgical ou FFP2 : changement toutes les 4h                                                                                                                                 | _  (0-5)                                                                                                                                                                                                                                                 |
| Friction hydro-alcoolique avant et après tout contact avec un patient                                                                                                                               | _  (0-5)                                                                                                                                                                                                                                                 |
| Lavage des mains avant et après tout contact avec un patient                                                                                                                                        | _  (0-5)                                                                                                                                                                                                                                                 |

# Carnet d'auto-évaluation

## Statut tabagique

Statut tabagique :

☐ Fumeur actif    ☐ Fumeur Passif    ☐ Non fumeur

| Semaine1                                                                                                                                                                                                                 |                                                                                                                                                                                                                                                           |
|--------------------------------------------------------------------------------------------------------------------------------------------------------------------------------------------------------------------------|-----------------------------------------------------------------------------------------------------------------------------------------------------------------------------------------------------------------------------------------------------------|
| Date d'évaluation                                                                                                                                                                                                        | /         /                                                                                                                                                                                                                                               |
| Si vous ressentez, de manière significative (=entraînant une atteinte/un changement de votre qualité de vie), un des symptômes suivants, merci de contacter le PM référent. Merci de répondre aux 8 questions suivantes. |                                                                                                                                                                                                                                                           |
| 1-Au cours de la semaine précédente, avez-vous été absent ?                                                                                                                                                              | <input type="radio"/> Oui <input type="radio"/> Non                                                                                                                                                                                                       |
| Si oui, combien de jours                                                                                                                                                                                                 |                                                                                                                                                                                                                                                           |
| 2 - Au cours de la semaine, avez-vous eu :                                                                                                                                                                               |                                                                                                                                                                                                                                                           |
| - de la fièvre (>38°C) :                                                                                                                                                                                                 | <input type="radio"/> Oui <input type="radio"/> Non                                                                                                                                                                                                       |
| Si oui, combien de jours                                                                                                                                                                                                 |                                                                                                                                                                                                                                                           |
| - des courbatures :                                                                                                                                                                                                      | <input type="radio"/> Oui <input type="radio"/> Non                                                                                                                                                                                                       |
| Si oui, combien de jours                                                                                                                                                                                                 |                                                                                                                                                                                                                                                           |
| - des frissons :                                                                                                                                                                                                         | <input type="radio"/> Oui <input type="radio"/> Non                                                                                                                                                                                                       |
| Si oui, combien de jours                                                                                                                                                                                                 |                                                                                                                                                                                                                                                           |
| - des sueurs importantes :                                                                                                                                                                                               | <input type="radio"/> Oui <input type="radio"/> Non                                                                                                                                                                                                       |
| Si oui, combien de jours                                                                                                                                                                                                 |                                                                                                                                                                                                                                                           |
| - des céphalées:                                                                                                                                                                                                         | <input type="radio"/> Oui <input type="radio"/> Non                                                                                                                                                                                                       |
| Si oui, combien de jours                                                                                                                                                                                                 |                                                                                                                                                                                                                                                           |
| -perte de l'odorat (anosmie)                                                                                                                                                                                             | <input type="radio"/> Oui <input type="radio"/> Non                                                                                                                                                                                                       |
| Si oui, combien de jours                                                                                                                                                                                                 |                                                                                                                                                                                                                                                           |
| -perte du goût (agueusie)                                                                                                                                                                                                | <input type="radio"/> Oui <input type="radio"/> Non                                                                                                                                                                                                       |
| Si oui, combien de jours                                                                                                                                                                                                 |                                                                                                                                                                                                                                                           |
| 3 - Si vous avez répondu OUI à une des questions précédentes, avez-vous eu :                                                                                                                                             |                                                                                                                                                                                                                                                           |
| - signes respiratoires : toux, douleur de gorge, expectoration, dyspnée                                                                                                                                                  | <input type="radio"/> Oui <input type="radio"/> Non                                                                                                                                                                                                       |
| - signes digestifs : nausées, vomissements, diarrhée, douleur abdominale                                                                                                                                                 | <input type="radio"/> Oui <input type="radio"/> Non                                                                                                                                                                                                       |
| 4 - Si vous avez répondu OUI à l'une des questions précédentes (2 ou 3), avez-vous dû être arrêté pour ces symptômes ?                                                                                                   | <input type="radio"/> Oui <input type="radio"/> Non                                                                                                                                                                                                       |
| Si oui, combien de jours                                                                                                                                                                                                 |                                                                                                                                                                                                                                                           |
| 5 - Si vous avez répondu OUI à l'une des questions précédentes avez-vous dû être hospitalisé pour ces symptômes ?                                                                                                        | <input type="radio"/> Oui <input type="radio"/> Non                                                                                                                                                                                                       |
| Si oui, combien de jours                                                                                                                                                                                                 |                                                                                                                                                                                                                                                           |
| 6 - Un diagnostic a-t-il été posé ?                                                                                                                                                                                      | <input type="radio"/> Oui <input type="radio"/> Non                                                                                                                                                                                                       |
| Si oui, lequel ?                                                                                                                                                                                                         | .....                                                                                                                                                                                                                                                     |
| 7 - Avez-vous été en contact avec un cas documenté ?                                                                                                                                                                     | <input type="radio"/> Oui <input type="radio"/> Non                                                                                                                                                                                                       |
| 8- Quel est votre moyen de transport régulier pour venir au travail ?                                                                                                                                                    | <div><input type="checkbox"/> Véhicule personnel</div> <div><input type="checkbox"/> Transport en commun</div> <div><input type="checkbox"/> A pied</div> <div><input type="checkbox"/> Vélo/trottinette</div> <div><input type="checkbox"/> Autres</div> |
| Préciser                                                                                                                                                                                                                 | .....                                                                                                                                                                                                                                                     |
| Préciser                                                                                                                                                                                                                 | <input type="radio"/> Personnel <input type="radio"/> Libre-service                                                                                                                                                                                       |

|                                                                                                                                                                                                                         |                                                                                                                                                                                                                |
|-------------------------------------------------------------------------------------------------------------------------------------------------------------------------------------------------------------------------|----------------------------------------------------------------------------------------------------------------------------------------------------------------------------------------------------------------|
| Semaine2                                                                                                                                                                                                                |                                                                                                                                                                                                                |
| Date d'évaluation                                                                                                                                                                                                       | /         /                                                                                                                                                                                                    |
| Si vous ressentez, de manière significative (=entraînant une atteinte/un changement de votre qualité de vie), un des symptômes suivants,merci de contacter le PM référent. Merci de répondre aux 8 questions suivantes. |                                                                                                                                                                                                                |
| 1- Au cours de la semaine précédente, avez-vous été absent?                                                                                                                                                             | <input type="radio"/> Oui <input type="radio"/> Non                                                                                                                                                            |
| Si oui, combien de jours                                                                                                                                                                                                |                                                                                                                                                                                                                |
| 2 - Au cours de la semaine, avez-vous eu :                                                                                                                                                                              |                                                                                                                                                                                                                |
| - de la fièvre (>38°C) :                                                                                                                                                                                                | <input type="radio"/> Oui <input type="radio"/> Non                                                                                                                                                            |
| Si oui, combien de jours                                                                                                                                                                                                |                                                                                                                                                                                                                |
| - des courbatures :                                                                                                                                                                                                     | <input type="radio"/> Oui <input type="radio"/> Non                                                                                                                                                            |
| Si oui, combien de jours                                                                                                                                                                                                |                                                                                                                                                                                                                |
| - des frissons :                                                                                                                                                                                                        | <input type="radio"/> Oui <input type="radio"/> Non                                                                                                                                                            |
| Si oui, combien de jours                                                                                                                                                                                                |                                                                                                                                                                                                                |
| - des sueurs importantes :                                                                                                                                                                                              | <input type="radio"/> Oui <input type="radio"/> Non                                                                                                                                                            |
| Si oui, combien de jours                                                                                                                                                                                                |                                                                                                                                                                                                                |
| - des céphalées:                                                                                                                                                                                                        | <input type="radio"/> Oui <input type="radio"/> Non                                                                                                                                                            |
| Si oui, combien de jours                                                                                                                                                                                                |                                                                                                                                                                                                                |
| -perte de l'odorat (anosmie)                                                                                                                                                                                            | <input type="radio"/> Oui <input type="radio"/> Non                                                                                                                                                            |
| Si oui, combien de jours                                                                                                                                                                                                |                                                                                                                                                                                                                |
| -perte du goût (agueusie)                                                                                                                                                                                               | <input type="radio"/> Oui <input type="radio"/> Non                                                                                                                                                            |
| Si oui, combien de jours                                                                                                                                                                                                |                                                                                                                                                                                                                |
| 3 - Si vous avez répondu OUI à une des questions précédentes, avez-vous eu :                                                                                                                                            |                                                                                                                                                                                                                |
| - signes respiratoires : toux, douleur de gorge, expectoration, dyspnée                                                                                                                                                 | <input type="radio"/> Oui <input type="radio"/> Non                                                                                                                                                            |
| - signes digestifs : nausées, vomissements, diarrhée, douleur abdominale                                                                                                                                                | <input type="radio"/> Oui <input type="radio"/> Non                                                                                                                                                            |
| 4 - Si vous avez répondu OUI à l'une des questions précédentes (2 ou 3), avez-vous dû être arrêté pour ces symptômes ?                                                                                                  | <input type="radio"/> Oui <input type="radio"/> Non                                                                                                                                                            |
| Si oui, combien de jours                                                                                                                                                                                                |                                                                                                                                                                                                                |
| 5 - Si vous avez répondu OUI à l'une des questions précédentes avez-vous dû être hospitalisé pour ces symptômes ?                                                                                                       | <input type="radio"/> Oui <input type="radio"/> Non                                                                                                                                                            |
| Si oui, combien de jours                                                                                                                                                                                                |                                                                                                                                                                                                                |
| 6 - Un diagnostic a-t-il été posé ?                                                                                                                                                                                     | <input type="radio"/> Oui <input type="radio"/> Non                                                                                                                                                            |
| Si oui, lequel ?                                                                                                                                                                                                        | .....                                                                                                                                                                                                          |
| 7 - Avez-vous été en contact avec un cas documenté ?                                                                                                                                                                    | <input type="radio"/> Oui <input type="radio"/> Non                                                                                                                                                            |
| 8- Quel est votre moyen de transport régulier pour venir au travail ?                                                                                                                                                   | <input type="checkbox"/> Véhicule personnel<br><input type="checkbox"/> Transport en commun<br><input type="checkbox"/> A pied<br><input type="checkbox"/> Vélo/trottinette<br><input type="checkbox"/> Autres |
| Préciser                                                                                                                                                                                                                | .....                                                                                                                                                                                                          |
| Préciser                                                                                                                                                                                                                | <input type="radio"/> Personnel <input type="radio"/> Libre-service                                                                                                                                            |

|                                                                                                                                                                                                                         |                                                                                                                                                                                                                |
|-------------------------------------------------------------------------------------------------------------------------------------------------------------------------------------------------------------------------|----------------------------------------------------------------------------------------------------------------------------------------------------------------------------------------------------------------|
| Semaine3                                                                                                                                                                                                                |                                                                                                                                                                                                                |
| Date d'évaluation                                                                                                                                                                                                       | /         /                                                                                                                                                                                                    |
| Si vous ressentez, de manière significative (=entraînant une atteinte/un changement de votre qualité de vie), un des symptômes suivants,merci de contacter le PM référent. Merci de répondre aux 8 questions suivantes. |                                                                                                                                                                                                                |
| 1- Au cours de la semaine précédente, avez-vous été absent?                                                                                                                                                             | <input type="radio"/> Oui <input type="radio"/> Non                                                                                                                                                            |
| Si oui, combien de jours                                                                                                                                                                                                |                                                                                                                                                                                                                |
| 2 - Au cours de la semaine, avez-vous eu :                                                                                                                                                                              |                                                                                                                                                                                                                |
| - de la fièvre (>38°C) :                                                                                                                                                                                                | <input type="radio"/> Oui <input type="radio"/> Non                                                                                                                                                            |
| Si oui, combien de jours                                                                                                                                                                                                |                                                                                                                                                                                                                |
| - des courbatures :                                                                                                                                                                                                     | <input type="radio"/> Oui <input type="radio"/> Non                                                                                                                                                            |
| Si oui, combien de jours                                                                                                                                                                                                |                                                                                                                                                                                                                |
| - des frissons :                                                                                                                                                                                                        | <input type="radio"/> Oui <input type="radio"/> Non                                                                                                                                                            |
| Si oui, combien de jours                                                                                                                                                                                                |                                                                                                                                                                                                                |
| - des sueurs importantes :                                                                                                                                                                                              | <input type="radio"/> Oui <input type="radio"/> Non                                                                                                                                                            |
| Si oui, combien de jours                                                                                                                                                                                                |                                                                                                                                                                                                                |
| - des céphalées:                                                                                                                                                                                                        | <input type="radio"/> Oui <input type="radio"/> Non                                                                                                                                                            |
| Si oui, combien de jours                                                                                                                                                                                                |                                                                                                                                                                                                                |
| -perte de l'odorat (anosmie)                                                                                                                                                                                            | <input type="radio"/> Oui <input type="radio"/> Non                                                                                                                                                            |
| Si oui, combien de jours                                                                                                                                                                                                |                                                                                                                                                                                                                |
| -perte du goût (agueusie)                                                                                                                                                                                               | <input type="radio"/> Oui <input type="radio"/> Non                                                                                                                                                            |
| Si oui, combien de jours                                                                                                                                                                                                |                                                                                                                                                                                                                |
| 3 - Si vous avez répondu OUI à une des questions précédentes, avez-vous eu :                                                                                                                                            |                                                                                                                                                                                                                |
| - signes respiratoires : toux, douleur de gorge, expectoration, dyspnée                                                                                                                                                 | <input type="radio"/> Oui <input type="radio"/> Non                                                                                                                                                            |
| - signes digestifs : nausées, vomissements, diarrhée, douleur abdominale                                                                                                                                                | <input type="radio"/> Oui <input type="radio"/> Non                                                                                                                                                            |
| 4 - Si vous avez répondu OUI à l'une des questions précédentes (2 ou 3), avez-vous dû être arrêté pour ces symptômes ?                                                                                                  | <input type="radio"/> Oui <input type="radio"/> Non                                                                                                                                                            |
| Si oui, combien de jours                                                                                                                                                                                                |                                                                                                                                                                                                                |
| 5 - Si vous avez répondu OUI à l'une des questions précédentes avez-vous dû être hospitalisé pour ces symptômes ?                                                                                                       | <input type="radio"/> Oui <input type="radio"/> Non                                                                                                                                                            |
| Si oui, combien de jours                                                                                                                                                                                                |                                                                                                                                                                                                                |
| 6 - Un diagnostic a-t-il été posé ?                                                                                                                                                                                     | <input type="radio"/> Oui <input type="radio"/> Non                                                                                                                                                            |
| Si oui, lequel ?                                                                                                                                                                                                        | .....                                                                                                                                                                                                          |
| 7 - Avez-vous été en contact avec un cas documenté ?                                                                                                                                                                    | <input type="radio"/> Oui <input type="radio"/> Non                                                                                                                                                            |
| 8- Quel est votre moyen de transport régulier pour venir au travail ?                                                                                                                                                   | <input type="checkbox"/> Véhicule personnel<br><input type="checkbox"/> Transport en commun<br><input type="checkbox"/> A pied<br><input type="checkbox"/> Vélo/trottinette<br><input type="checkbox"/> Autres |
| Préciser                                                                                                                                                                                                                | .....                                                                                                                                                                                                          |
| Préciser                                                                                                                                                                                                                | <input type="radio"/> Personnel <input type="radio"/> Libre-service                                                                                                                                            |

|                                                                                                                                                                                                                          |                                                                                                                                                                                                                |
|--------------------------------------------------------------------------------------------------------------------------------------------------------------------------------------------------------------------------|----------------------------------------------------------------------------------------------------------------------------------------------------------------------------------------------------------------|
| Semaine4                                                                                                                                                                                                                 |                                                                                                                                                                                                                |
| Date d'évaluation                                                                                                                                                                                                        | /         /                                                                                                                                                                                                    |
| Si vous ressentez, de manière significative (=entraînant une atteinte/un changement de votre qualité de vie), un des symptômes suivants, merci de contacter le PM référent. Merci de répondre aux 8 questions suivantes. |                                                                                                                                                                                                                |
| 1-Au cours de la semaine précédente, avez-vous été absent?                                                                                                                                                               | <input type="radio"/> Oui <input type="radio"/> Non                                                                                                                                                            |
| Si oui, combien de jours                                                                                                                                                                                                 |                                                                                                                                                                                                                |
| 2 - Au cours de la semaine, avez-vous eu :                                                                                                                                                                               |                                                                                                                                                                                                                |
| - de la fièvre (>38°C) :                                                                                                                                                                                                 | <input type="radio"/> Oui <input type="radio"/> Non                                                                                                                                                            |
| Si oui, combien de jours                                                                                                                                                                                                 |                                                                                                                                                                                                                |
| - des courbatures :                                                                                                                                                                                                      | <input type="radio"/> Oui <input type="radio"/> Non                                                                                                                                                            |
| Si oui, combien de jours                                                                                                                                                                                                 |                                                                                                                                                                                                                |
| - des frissons :                                                                                                                                                                                                         | <input type="radio"/> Oui <input type="radio"/> Non                                                                                                                                                            |
| Si oui, combien de jours                                                                                                                                                                                                 |                                                                                                                                                                                                                |
| - des sueurs importantes :                                                                                                                                                                                               | <input type="radio"/> Oui <input type="radio"/> Non                                                                                                                                                            |
| Si oui, combien de jours                                                                                                                                                                                                 |                                                                                                                                                                                                                |
| - des céphalées:                                                                                                                                                                                                         | <input type="radio"/> Oui <input type="radio"/> Non                                                                                                                                                            |
| Si oui, combien de jours                                                                                                                                                                                                 |                                                                                                                                                                                                                |
| -perte de l'odorat (anosmie)                                                                                                                                                                                             | <input type="radio"/> Oui <input type="radio"/> Non                                                                                                                                                            |
| Si oui, combien de jours                                                                                                                                                                                                 |                                                                                                                                                                                                                |
| -perte du goût (agueusie)                                                                                                                                                                                                | <input type="radio"/> Oui <input type="radio"/> Non                                                                                                                                                            |
| Si oui, combien de jours                                                                                                                                                                                                 |                                                                                                                                                                                                                |
| 3 - Si vous avez répondu OUI à une des questions précédentes, avez-vous eu :                                                                                                                                             |                                                                                                                                                                                                                |
| - signes respiratoires : toux, douleur de gorge, expectoration, dyspnée                                                                                                                                                  | <input type="radio"/> Oui <input type="radio"/> Non                                                                                                                                                            |
| - signes digestifs : nausées, vomissements, diarrhée, douleur abdominale                                                                                                                                                 | <input type="radio"/> Oui <input type="radio"/> Non                                                                                                                                                            |
| 4 - Si vous avez répondu OUI à l'une des questions précédentes (2 ou 3), avez-vous dû être arrêté pour ces symptômes ?                                                                                                   | <input type="radio"/> Oui <input type="radio"/> Non                                                                                                                                                            |
| Si oui, combien de jours                                                                                                                                                                                                 |                                                                                                                                                                                                                |
| 5 - Si vous avez répondu OUI à l'une des questions précédentes avez-vous dû être hospitalisé pour ces symptômes ?                                                                                                        | <input type="radio"/> Oui <input type="radio"/> Non                                                                                                                                                            |
| Si oui, combien de jours                                                                                                                                                                                                 |                                                                                                                                                                                                                |
| 6 - Un diagnostic a-t-il été posé ?                                                                                                                                                                                      | <input type="radio"/> Oui <input type="radio"/> Non                                                                                                                                                            |
| Si oui, lequel ?                                                                                                                                                                                                         | .....                                                                                                                                                                                                          |
| 7 - Avez-vous été en contact avec un cas documenté ?                                                                                                                                                                     | <input type="radio"/> Oui <input type="radio"/> Non                                                                                                                                                            |
| 8- Quel est votre moyen de transport régulier pour venir au travail ?                                                                                                                                                    | <input type="checkbox"/> Véhicule personnel<br><input type="checkbox"/> Transport en commun<br><input type="checkbox"/> A pied<br><input type="checkbox"/> Vélo/trottinette<br><input type="checkbox"/> Autres |
| Préciser                                                                                                                                                                                                                 | .....                                                                                                                                                                                                          |
| Préciser                                                                                                                                                                                                                 | <input type="radio"/> Personnel <input type="radio"/> Libre-service                                                                                                                                            |

|                                                                                                                                                                                                                         |                                                                                                                                                                                                                |
|-------------------------------------------------------------------------------------------------------------------------------------------------------------------------------------------------------------------------|----------------------------------------------------------------------------------------------------------------------------------------------------------------------------------------------------------------|
| Semaine5                                                                                                                                                                                                                |                                                                                                                                                                                                                |
| Date d'évaluation                                                                                                                                                                                                       | /         /                                                                                                                                                                                                    |
| Si vous ressentez, de manière significative (=entraînant une atteinte/un changement de votre qualité de vie), un des symptômes suivants,merci de contacter le PM référent. Merci de répondre aux 8 questions suivantes. |                                                                                                                                                                                                                |
| 1- Au cours de la semaine précédente, avez-vous été absent?                                                                                                                                                             | <input type="radio"/> Oui <input type="radio"/> Non                                                                                                                                                            |
| Si oui, combien de jours                                                                                                                                                                                                |                                                                                                                                                                                                                |
| 2 - Au cours de la semaine, avez-vous eu :                                                                                                                                                                              |                                                                                                                                                                                                                |
| - de la fièvre (>38°C) :                                                                                                                                                                                                | <input type="radio"/> Oui <input type="radio"/> Non                                                                                                                                                            |
| Si oui, combien de jours                                                                                                                                                                                                |                                                                                                                                                                                                                |
| - des courbatures :                                                                                                                                                                                                     | <input type="radio"/> Oui <input type="radio"/> Non                                                                                                                                                            |
| Si oui, combien de jours                                                                                                                                                                                                |                                                                                                                                                                                                                |
| - des frissons :                                                                                                                                                                                                        | <input type="radio"/> Oui <input type="radio"/> Non                                                                                                                                                            |
| Si oui, combien de jours                                                                                                                                                                                                |                                                                                                                                                                                                                |
| - des sueurs importantes :                                                                                                                                                                                              | <input type="radio"/> Oui <input type="radio"/> Non                                                                                                                                                            |
| Si oui, combien de jours                                                                                                                                                                                                |                                                                                                                                                                                                                |
| - des céphalées:                                                                                                                                                                                                        | <input type="radio"/> Oui <input type="radio"/> Non                                                                                                                                                            |
| Si oui, combien de jours                                                                                                                                                                                                |                                                                                                                                                                                                                |
| -perte de l'odorat (anosmie)                                                                                                                                                                                            | <input type="radio"/> Oui <input type="radio"/> Non                                                                                                                                                            |
| Si oui, combien de jours                                                                                                                                                                                                |                                                                                                                                                                                                                |
| -perte du goût (agueusie)                                                                                                                                                                                               | <input type="radio"/> Oui <input type="radio"/> Non                                                                                                                                                            |
| Si oui, combien de jours                                                                                                                                                                                                |                                                                                                                                                                                                                |
| 3 - Si vous avez répondu OUI à une des questions précédentes, avez-vous eu :                                                                                                                                            |                                                                                                                                                                                                                |
| - signes respiratoires : toux, douleur de gorge, expectoration, dyspnée                                                                                                                                                 | <input type="radio"/> Oui <input type="radio"/> Non                                                                                                                                                            |
| - signes digestifs : nausées, vomissements, diarrhée, douleur abdominale                                                                                                                                                | <input type="radio"/> Oui <input type="radio"/> Non                                                                                                                                                            |
| 4 - Si vous avez répondu OUI à l'une des questions précédentes (2 ou 3), avez-vous dû être arrêté pour ces symptômes ?                                                                                                  | <input type="radio"/> Oui <input type="radio"/> Non                                                                                                                                                            |
| Si oui, combien de jours                                                                                                                                                                                                |                                                                                                                                                                                                                |
| 5 - Si vous avez répondu OUI à l'une des questions précédentes avez-vous dû être hospitalisé pour ces symptômes ?                                                                                                       | <input type="radio"/> Oui <input type="radio"/> Non                                                                                                                                                            |
| Si oui, combien de jours                                                                                                                                                                                                |                                                                                                                                                                                                                |
| 6 - Un diagnostic a-t-il été posé ?                                                                                                                                                                                     | <input type="radio"/> Oui <input type="radio"/> Non                                                                                                                                                            |
| Si oui, lequel ?                                                                                                                                                                                                        | .....                                                                                                                                                                                                          |
| 7 - Avez-vous été en contact avec un cas documenté ?                                                                                                                                                                    | <input type="radio"/> Oui <input type="radio"/> Non                                                                                                                                                            |
| 8- Quel est votre moyen de transport régulier pour venir au travail ?                                                                                                                                                   | <input type="checkbox"/> Véhicule personnel<br><input type="checkbox"/> Transport en commun<br><input type="checkbox"/> A pied<br><input type="checkbox"/> Vélo/trottinette<br><input type="checkbox"/> Autres |
| Préciser                                                                                                                                                                                                                | .....                                                                                                                                                                                                          |
| Préciser                                                                                                                                                                                                                | <input type="radio"/> Personnel <input type="radio"/> Libre-service                                                                                                                                            |

|                                                                                                                                                                                                                         |                                                                                                                                                                                                                |
|-------------------------------------------------------------------------------------------------------------------------------------------------------------------------------------------------------------------------|----------------------------------------------------------------------------------------------------------------------------------------------------------------------------------------------------------------|
| Semaine6                                                                                                                                                                                                                |                                                                                                                                                                                                                |
| Date d'évaluation                                                                                                                                                                                                       | /         /                                                                                                                                                                                                    |
| Si vous ressentez, de manière significative (=entraînant une atteinte/un changement de votre qualité de vie), un des symptômes suivants,merci de contacter le PM référent. Merci de répondre aux 8 questions suivantes. |                                                                                                                                                                                                                |
| 1-Au cours de la semaine précédente, avez-vous été absent?                                                                                                                                                              | <input type="radio"/> Oui <input type="radio"/> Non                                                                                                                                                            |
| Si oui, combien de jours                                                                                                                                                                                                |                                                                                                                                                                                                                |
| 2 - Au cours de la semaine, avez-vous eu :                                                                                                                                                                              |                                                                                                                                                                                                                |
| - de la fièvre (>38°C) :                                                                                                                                                                                                | <input type="radio"/> Oui <input type="radio"/> Non                                                                                                                                                            |
| Si oui, combien de jours                                                                                                                                                                                                |                                                                                                                                                                                                                |
| - des courbatures :                                                                                                                                                                                                     | <input type="radio"/> Oui <input type="radio"/> Non                                                                                                                                                            |
| Si oui, combien de jours                                                                                                                                                                                                |                                                                                                                                                                                                                |
| - des frissons :                                                                                                                                                                                                        | <input type="radio"/> Oui <input type="radio"/> Non                                                                                                                                                            |
| Si oui, combien de jours                                                                                                                                                                                                |                                                                                                                                                                                                                |
| - des sueurs importantes :                                                                                                                                                                                              | <input type="radio"/> Oui <input type="radio"/> Non                                                                                                                                                            |
| Si oui, combien de jours                                                                                                                                                                                                |                                                                                                                                                                                                                |
| - des céphalées:                                                                                                                                                                                                        | <input type="radio"/> Oui <input type="radio"/> Non                                                                                                                                                            |
| Si oui, combien de jours                                                                                                                                                                                                |                                                                                                                                                                                                                |
| -perte de l'odorat (anosmie)                                                                                                                                                                                            | <input type="radio"/> Oui <input type="radio"/> Non                                                                                                                                                            |
| Si oui, combien de jours                                                                                                                                                                                                |                                                                                                                                                                                                                |
| -perte du goût (agueusie)                                                                                                                                                                                               | <input type="radio"/> Oui <input type="radio"/> Non                                                                                                                                                            |
| Si oui, combien de jours                                                                                                                                                                                                |                                                                                                                                                                                                                |
| 3 - Si vous avez répondu OUI à une des questions précédentes, avez-vous eu :                                                                                                                                            |                                                                                                                                                                                                                |
| - signes respiratoires : toux, douleur de gorge, expectoration, dyspnée                                                                                                                                                 | <input type="radio"/> Oui <input type="radio"/> Non                                                                                                                                                            |
| - signes digestifs : nausées, vomissements, diarrhée, douleur abdominale                                                                                                                                                | <input type="radio"/> Oui <input type="radio"/> Non                                                                                                                                                            |
| 4 - Si vous avez répondu OUI à l'une des questions précédentes (2 ou 3), avez-vous dû être arrêté pour ces symptômes ?                                                                                                  | <input type="radio"/> Oui <input type="radio"/> Non                                                                                                                                                            |
| Si oui, combien de jours                                                                                                                                                                                                |                                                                                                                                                                                                                |
| 5 - Si vous avez répondu OUI à l'une des questions précédentes avez-vous dû être hospitalisé pour ces symptômes ?                                                                                                       | <input type="radio"/> Oui <input type="radio"/> Non                                                                                                                                                            |
| Si oui, combien de jours                                                                                                                                                                                                |                                                                                                                                                                                                                |
| 6 - Un diagnostic a-t-il été posé ?                                                                                                                                                                                     | <input type="radio"/> Oui <input type="radio"/> Non                                                                                                                                                            |
| Si oui, lequel ?                                                                                                                                                                                                        | .....                                                                                                                                                                                                          |
| 7 - Avez-vous été en contact avec un cas documenté ?                                                                                                                                                                    | <input type="radio"/> Oui <input type="radio"/> Non                                                                                                                                                            |
| 8- Quel est votre moyen de transport régulier pour venir au travail ?                                                                                                                                                   | <input type="checkbox"/> Véhicule personnel<br><input type="checkbox"/> Transport en commun<br><input type="checkbox"/> A pied<br><input type="checkbox"/> Vélo/trottinette<br><input type="checkbox"/> Autres |
| Préciser                                                                                                                                                                                                                | .....                                                                                                                                                                                                          |
| Préciser                                                                                                                                                                                                                | <input type="radio"/> Personnel <input type="radio"/> Libre-service                                                                                                                                            |

|                                                                                                                                                                                                                         |                                                                                                                                                                                                                |
|-------------------------------------------------------------------------------------------------------------------------------------------------------------------------------------------------------------------------|----------------------------------------------------------------------------------------------------------------------------------------------------------------------------------------------------------------|
| Semaine7                                                                                                                                                                                                                |                                                                                                                                                                                                                |
| Date d'évaluation                                                                                                                                                                                                       | /         /                                                                                                                                                                                                    |
| Si vous ressentez, de manière significative (=entraînant une atteinte/un changement de votre qualité de vie), un des symptômes suivants,merci de contacter le PM référent. Merci de répondre aux 8 questions suivantes. |                                                                                                                                                                                                                |
| 1-Au cours de la semaine précédente, avez-vous été absent?                                                                                                                                                              | <input type="radio"/> Oui <input type="radio"/> Non                                                                                                                                                            |
| Si oui, combien de jours                                                                                                                                                                                                |                                                                                                                                                                                                                |
| 2 - Au cours de la semaine, avez-vous eu :                                                                                                                                                                              |                                                                                                                                                                                                                |
| - de la fièvre (>38°C) :                                                                                                                                                                                                | <input type="radio"/> Oui <input type="radio"/> Non                                                                                                                                                            |
| Si oui, combien de jours                                                                                                                                                                                                |                                                                                                                                                                                                                |
| - des courbatures :                                                                                                                                                                                                     | <input type="radio"/> Oui <input type="radio"/> Non                                                                                                                                                            |
| Si oui, combien de jours                                                                                                                                                                                                |                                                                                                                                                                                                                |
| - des frissons :                                                                                                                                                                                                        | <input type="radio"/> Oui <input type="radio"/> Non                                                                                                                                                            |
| Si oui, combien de jours                                                                                                                                                                                                |                                                                                                                                                                                                                |
| - des sueurs importantes :                                                                                                                                                                                              | <input type="radio"/> Oui <input type="radio"/> Non                                                                                                                                                            |
| Si oui, combien de jours                                                                                                                                                                                                |                                                                                                                                                                                                                |
| - des céphalées:                                                                                                                                                                                                        | <input type="radio"/> Oui <input type="radio"/> Non                                                                                                                                                            |
| Si oui, combien de jours                                                                                                                                                                                                |                                                                                                                                                                                                                |
| -perte de l'odorat (anosmie)                                                                                                                                                                                            | <input type="radio"/> Oui <input type="radio"/> Non                                                                                                                                                            |
| Si oui, combien de jours                                                                                                                                                                                                |                                                                                                                                                                                                                |
| -perte du goût (agueusie)                                                                                                                                                                                               | <input type="radio"/> Oui <input type="radio"/> Non                                                                                                                                                            |
| Si oui, combien de jours                                                                                                                                                                                                |                                                                                                                                                                                                                |
| 3 - Si vous avez répondu OUI à une des questions précédentes, avez-vous eu :                                                                                                                                            |                                                                                                                                                                                                                |
| - signes respiratoires : toux, douleur de gorge, expectoration, dyspnée                                                                                                                                                 | <input type="radio"/> Oui <input type="radio"/> Non                                                                                                                                                            |
| - signes digestifs : nausées, vomissements, diarrhée, douleur abdominale                                                                                                                                                | <input type="radio"/> Oui <input type="radio"/> Non                                                                                                                                                            |
| 4 - Si vous avez répondu OUI à l'une des questions précédentes (2 ou 3), avez-vous dû être arrêté pour ces symptômes ?                                                                                                  | <input type="radio"/> Oui <input type="radio"/> Non                                                                                                                                                            |
| Si oui, combien de jours                                                                                                                                                                                                |                                                                                                                                                                                                                |
| 5 - Si vous avez répondu OUI à l'une des questions précédentes avez-vous dû être hospitalisé pour ces symptômes ?                                                                                                       | <input type="radio"/> Oui <input type="radio"/> Non                                                                                                                                                            |
| Si oui, combien de jours                                                                                                                                                                                                |                                                                                                                                                                                                                |
| 6 - Un diagnostic a-t-il été posé ?                                                                                                                                                                                     | <input type="radio"/> Oui <input type="radio"/> Non                                                                                                                                                            |
| Si oui, lequel ?                                                                                                                                                                                                        | .....                                                                                                                                                                                                          |
| 7 - Avez-vous été en contact avec un cas documenté ?                                                                                                                                                                    | <input type="radio"/> Oui <input type="radio"/> Non                                                                                                                                                            |
| 8- Quel est votre moyen de transport régulier pour venir au travail ?                                                                                                                                                   | <input type="checkbox"/> Véhicule personnel<br><input type="checkbox"/> Transport en commun<br><input type="checkbox"/> A pied<br><input type="checkbox"/> Vélo/trottinette<br><input type="checkbox"/> Autres |
| Préciser                                                                                                                                                                                                                | .....                                                                                                                                                                                                          |
| Préciser                                                                                                                                                                                                                | <input type="radio"/> Personnel <input type="radio"/> Libre-service                                                                                                                                            |

|                                                                                                                                                                                                                         |                                                                                                                                                                                                                |
|-------------------------------------------------------------------------------------------------------------------------------------------------------------------------------------------------------------------------|----------------------------------------------------------------------------------------------------------------------------------------------------------------------------------------------------------------|
| Semaine8                                                                                                                                                                                                                |                                                                                                                                                                                                                |
| Date d'évaluation                                                                                                                                                                                                       | /         /                                                                                                                                                                                                    |
| Si vous ressentez, de manière significative (=entraînant une atteinte/un changement de votre qualité de vie), un des symptômes suivants,merci de contacter le PM référent. Merci de répondre aux 8 questions suivantes. |                                                                                                                                                                                                                |
| 1-Au cours de la semaine précédente, avez-vous été absent?                                                                                                                                                              | <input type="radio"/> Oui <input type="radio"/> Non                                                                                                                                                            |
| Si oui, combien de jours                                                                                                                                                                                                |                                                                                                                                                                                                                |
| 2 - Au cours de la semaine, avez-vous eu :                                                                                                                                                                              |                                                                                                                                                                                                                |
| - de la fièvre (>38°C) :                                                                                                                                                                                                | <input type="radio"/> Oui <input type="radio"/> Non                                                                                                                                                            |
| Si oui, combien de jours                                                                                                                                                                                                |                                                                                                                                                                                                                |
| - des courbatures :                                                                                                                                                                                                     | <input type="radio"/> Oui <input type="radio"/> Non                                                                                                                                                            |
| Si oui, combien de jours                                                                                                                                                                                                |                                                                                                                                                                                                                |
| - des frissons :                                                                                                                                                                                                        | <input type="radio"/> Oui <input type="radio"/> Non                                                                                                                                                            |
| Si oui, combien de jours                                                                                                                                                                                                |                                                                                                                                                                                                                |
| - des sueurs importantes :                                                                                                                                                                                              | <input type="radio"/> Oui <input type="radio"/> Non                                                                                                                                                            |
| Si oui, combien de jours                                                                                                                                                                                                |                                                                                                                                                                                                                |
| - des céphalées:                                                                                                                                                                                                        | <input type="radio"/> Oui <input type="radio"/> Non                                                                                                                                                            |
| Si oui, combien de jours                                                                                                                                                                                                |                                                                                                                                                                                                                |
| -perte de l'odorat (anosmie)                                                                                                                                                                                            | <input type="radio"/> Oui <input type="radio"/> Non                                                                                                                                                            |
| Si oui, combien de jours                                                                                                                                                                                                |                                                                                                                                                                                                                |
| -perte du goût (agueusie)                                                                                                                                                                                               | <input type="radio"/> Oui <input type="radio"/> Non                                                                                                                                                            |
| Si oui, combien de jours                                                                                                                                                                                                |                                                                                                                                                                                                                |
| 3 - Si vous avez répondu OUI à une des questions précédentes, avez-vous eu :                                                                                                                                            |                                                                                                                                                                                                                |
| - signes respiratoires : toux, douleur de gorge, expectoration, dyspnée                                                                                                                                                 | <input type="radio"/> Oui <input type="radio"/> Non                                                                                                                                                            |
| - signes digestifs : nausées, vomissements, diarrhée, douleur abdominale                                                                                                                                                | <input type="radio"/> Oui <input type="radio"/> Non                                                                                                                                                            |
| 4 - Si vous avez répondu OUI à l'une des questions précédentes (2 ou 3), avez-vous dû être arrêté pour ces symptômes ?                                                                                                  | <input type="radio"/> Oui <input type="radio"/> Non                                                                                                                                                            |
| Si oui, combien de jours                                                                                                                                                                                                |                                                                                                                                                                                                                |
| 5 - Si vous avez répondu OUI à l'une des questions précédentes avez-vous dû être hospitalisé pour ces symptômes ?                                                                                                       | <input type="radio"/> Oui <input type="radio"/> Non                                                                                                                                                            |
| Si oui, combien de jours                                                                                                                                                                                                |                                                                                                                                                                                                                |
| 6 - Un diagnostic a-t-il été posé ?                                                                                                                                                                                     | <input type="radio"/> Oui <input type="radio"/> Non                                                                                                                                                            |
| Si oui, lequel ?                                                                                                                                                                                                        | .....                                                                                                                                                                                                          |
| 7 - Avez-vous été en contact avec un cas documenté ?                                                                                                                                                                    | <input type="radio"/> Oui <input type="radio"/> Non                                                                                                                                                            |
| 8- Quel est votre moyen de transport régulier pour venir au travail ?                                                                                                                                                   | <input type="checkbox"/> Véhicule personnel<br><input type="checkbox"/> Transport en commun<br><input type="checkbox"/> A pied<br><input type="checkbox"/> Vélo/trottinette<br><input type="checkbox"/> Autres |
| Préciser                                                                                                                                                                                                                | .....                                                                                                                                                                                                          |
| Préciser                                                                                                                                                                                                                | <input type="radio"/> Personnel <input type="radio"/> Libre-service                                                                                                                                            |

|                                                                                                                                                                                                                         |                                                                                                                                                                                                                |
|-------------------------------------------------------------------------------------------------------------------------------------------------------------------------------------------------------------------------|----------------------------------------------------------------------------------------------------------------------------------------------------------------------------------------------------------------|
| Semaine9                                                                                                                                                                                                                |                                                                                                                                                                                                                |
| Date d'évaluation                                                                                                                                                                                                       | /         /                                                                                                                                                                                                    |
| Si vous ressentez, de manière significative (=entraînant une atteinte/un changement de votre qualité de vie), un des symptômes suivants,merci de contacter le PM référent. Merci de répondre aux 8 questions suivantes. |                                                                                                                                                                                                                |
| 1- Au cours de la semaine précédente, avez-vous été absent?                                                                                                                                                             | <input type="radio"/> Oui <input type="radio"/> Non                                                                                                                                                            |
| Si oui, combien de jours                                                                                                                                                                                                |                                                                                                                                                                                                                |
| 2 - Au cours de la semaine, avez-vous eu :                                                                                                                                                                              |                                                                                                                                                                                                                |
| - de la fièvre (>38°C) :                                                                                                                                                                                                | <input type="radio"/> Oui <input type="radio"/> Non                                                                                                                                                            |
| Si oui, combien de jours                                                                                                                                                                                                |                                                                                                                                                                                                                |
| - des courbatures :                                                                                                                                                                                                     | <input type="radio"/> Oui <input type="radio"/> Non                                                                                                                                                            |
| Si oui, combien de jours                                                                                                                                                                                                |                                                                                                                                                                                                                |
| - des frissons :                                                                                                                                                                                                        | <input type="radio"/> Oui <input type="radio"/> Non                                                                                                                                                            |
| Si oui, combien de jours                                                                                                                                                                                                |                                                                                                                                                                                                                |
| - des sueurs importantes :                                                                                                                                                                                              | <input type="radio"/> Oui <input type="radio"/> Non                                                                                                                                                            |
| Si oui, combien de jours                                                                                                                                                                                                |                                                                                                                                                                                                                |
| - des céphalées:                                                                                                                                                                                                        | <input type="radio"/> Oui <input type="radio"/> Non                                                                                                                                                            |
| Si oui, combien de jours                                                                                                                                                                                                |                                                                                                                                                                                                                |
| -perte de l'odorat (anosmie)                                                                                                                                                                                            | <input type="radio"/> Oui <input type="radio"/> Non                                                                                                                                                            |
| Si oui, combien de jours                                                                                                                                                                                                |                                                                                                                                                                                                                |
| -perte du goût (agueusie)                                                                                                                                                                                               | <input type="radio"/> Oui <input type="radio"/> Non                                                                                                                                                            |
| Si oui, combien de jours                                                                                                                                                                                                |                                                                                                                                                                                                                |
| 3 - Si vous avez répondu OUI à une des questions précédentes, avez-vous eu :                                                                                                                                            |                                                                                                                                                                                                                |
| - signes respiratoires : toux, douleur de gorge, expectoration, dyspnée                                                                                                                                                 | <input type="radio"/> Oui <input type="radio"/> Non                                                                                                                                                            |
| - signes digestifs : nausées, vomissements, diarrhée, douleur abdominale                                                                                                                                                | <input type="radio"/> Oui <input type="radio"/> Non                                                                                                                                                            |
| 4 - Si vous avez répondu OUI à l'une des questions précédentes (2 ou 3), avez-vous dû être arrêté pour ces symptômes ?                                                                                                  | <input type="radio"/> Oui <input type="radio"/> Non                                                                                                                                                            |
| Si oui, combien de jours                                                                                                                                                                                                |                                                                                                                                                                                                                |
| 5 - Si vous avez répondu OUI à l'une des questions précédentes avez-vous dû être hospitalisé pour ces symptômes ?                                                                                                       | <input type="radio"/> Oui <input type="radio"/> Non                                                                                                                                                            |
| Si oui, combien de jours                                                                                                                                                                                                |                                                                                                                                                                                                                |
| 6 - Un diagnostic a-t-il été posé ?                                                                                                                                                                                     | <input type="radio"/> Oui <input type="radio"/> Non                                                                                                                                                            |
| Si oui, lequel ?                                                                                                                                                                                                        | .....                                                                                                                                                                                                          |
| 7 - Avez-vous été en contact avec un cas documenté ?                                                                                                                                                                    | <input type="radio"/> Oui <input type="radio"/> Non                                                                                                                                                            |
| 8- Quel est votre moyen de transport régulier pour venir au travail ?                                                                                                                                                   | <input type="checkbox"/> Véhicule personnel<br><input type="checkbox"/> Transport en commun<br><input type="checkbox"/> A pied<br><input type="checkbox"/> Vélo/trottinette<br><input type="checkbox"/> Autres |
| Préciser                                                                                                                                                                                                                | .....                                                                                                                                                                                                          |
| Préciser                                                                                                                                                                                                                | <input type="radio"/> Personnel <input type="radio"/> Libre-service                                                                                                                                            |

|                                                                                                                                                                                                                         |                                                                                                                                                                                                                |
|-------------------------------------------------------------------------------------------------------------------------------------------------------------------------------------------------------------------------|----------------------------------------------------------------------------------------------------------------------------------------------------------------------------------------------------------------|
| Semaine10                                                                                                                                                                                                               |                                                                                                                                                                                                                |
| Date d'évaluation                                                                                                                                                                                                       | /         /                                                                                                                                                                                                    |
| Si vous ressentez, de manière significative (=entraînant une atteinte/un changement de votre qualité de vie), un des symptômes suivants,merci de contacter le PM référent. Merci de répondre aux 8 questions suivantes. |                                                                                                                                                                                                                |
| 1-Au cours de la semaine précédente, avez-vous été absent?                                                                                                                                                              | <input type="radio"/> Oui <input type="radio"/> Non                                                                                                                                                            |
| Si oui, combien de jours                                                                                                                                                                                                |                                                                                                                                                                                                                |
| 2 - Au cours de la semaine, avez-vous eu :                                                                                                                                                                              |                                                                                                                                                                                                                |
| - de la fièvre (>38°C) :                                                                                                                                                                                                | <input type="radio"/> Oui <input type="radio"/> Non                                                                                                                                                            |
| Si oui, combien de jours                                                                                                                                                                                                |                                                                                                                                                                                                                |
| - des courbatures :                                                                                                                                                                                                     | <input type="radio"/> Oui <input type="radio"/> Non                                                                                                                                                            |
| Si oui, combien de jours                                                                                                                                                                                                |                                                                                                                                                                                                                |
| - des frissons :                                                                                                                                                                                                        | <input type="radio"/> Oui <input type="radio"/> Non                                                                                                                                                            |
| Si oui, combien de jours                                                                                                                                                                                                |                                                                                                                                                                                                                |
| - des sueurs importantes :                                                                                                                                                                                              | <input type="radio"/> Oui <input type="radio"/> Non                                                                                                                                                            |
| Si oui, combien de jours                                                                                                                                                                                                |                                                                                                                                                                                                                |
| - des céphalées:                                                                                                                                                                                                        | <input type="radio"/> Oui <input type="radio"/> Non                                                                                                                                                            |
| Si oui, combien de jours                                                                                                                                                                                                |                                                                                                                                                                                                                |
| -perte de l'odorat (anosmie)                                                                                                                                                                                            | <input type="radio"/> Oui <input type="radio"/> Non                                                                                                                                                            |
| Si oui, combien de jours                                                                                                                                                                                                |                                                                                                                                                                                                                |
| -perte du goût (agueusie)                                                                                                                                                                                               | <input type="radio"/> Oui <input type="radio"/> Non                                                                                                                                                            |
| Si oui, combien de jours                                                                                                                                                                                                |                                                                                                                                                                                                                |
| 3 - Si vous avez répondu OUI à une des questions précédentes, avez-vous eu :                                                                                                                                            |                                                                                                                                                                                                                |
| - signes respiratoires : toux, douleur de gorge, expectoration, dyspnée                                                                                                                                                 | <input type="radio"/> Oui <input type="radio"/> Non                                                                                                                                                            |
| - signes digestifs : nausées, vomissements, diarrhée, douleur abdominale                                                                                                                                                | <input type="radio"/> Oui <input type="radio"/> Non                                                                                                                                                            |
| 4 - Si vous avez répondu OUI à l'une des questions précédentes (2 ou 3), avez-vous dû être arrêté pour ces symptômes ?                                                                                                  | <input type="radio"/> Oui <input type="radio"/> Non                                                                                                                                                            |
| Si oui, combien de jours                                                                                                                                                                                                |                                                                                                                                                                                                                |
| 5 - Si vous avez répondu OUI à l'une des questions précédentes avez-vous dû être hospitalisé pour ces symptômes ?                                                                                                       | <input type="radio"/> Oui <input type="radio"/> Non                                                                                                                                                            |
| Si oui, combien de jours                                                                                                                                                                                                |                                                                                                                                                                                                                |
| 6 - Un diagnostic a-t-il été posé ?                                                                                                                                                                                     | <input type="radio"/> Oui <input type="radio"/> Non                                                                                                                                                            |
| Si oui, lequel ?                                                                                                                                                                                                        | .....                                                                                                                                                                                                          |
| 7 - Avez-vous été en contact avec un cas documenté ?                                                                                                                                                                    | <input type="radio"/> Oui <input type="radio"/> Non                                                                                                                                                            |
| 8- Quel est votre moyen de transport régulier pour venir au travail ?                                                                                                                                                   | <input type="checkbox"/> Véhicule personnel<br><input type="checkbox"/> Transport en commun<br><input type="checkbox"/> A pied<br><input type="checkbox"/> Vélo/trottinette<br><input type="checkbox"/> Autres |
| Préciser                                                                                                                                                                                                                | .....                                                                                                                                                                                                          |
| Préciser                                                                                                                                                                                                                | <input type="radio"/> Personnel <input type="radio"/> Libre-service                                                                                                                                            |

|                                                                                                                                                                                                                         |                                                                                                                                                                                                                |
|-------------------------------------------------------------------------------------------------------------------------------------------------------------------------------------------------------------------------|----------------------------------------------------------------------------------------------------------------------------------------------------------------------------------------------------------------|
| Semaine11                                                                                                                                                                                                               |                                                                                                                                                                                                                |
| Date d'évaluation                                                                                                                                                                                                       | /         /                                                                                                                                                                                                    |
| Si vous ressentez, de manière significative (=entraînant une atteinte/un changement de votre qualité de vie), un des symptômes suivants,merci de contacter le PM référent. Merci de répondre aux 8 questions suivantes. |                                                                                                                                                                                                                |
| 1-Au cours de la semaine précédente, avez-vous été absent?                                                                                                                                                              | <input type="radio"/> Oui <input type="radio"/> Non                                                                                                                                                            |
| Si oui, combien de jours                                                                                                                                                                                                |                                                                                                                                                                                                                |
| 2 - Au cours de la semaine, avez-vous eu :                                                                                                                                                                              |                                                                                                                                                                                                                |
| - de la fièvre (>38°C) :                                                                                                                                                                                                | <input type="radio"/> Oui <input type="radio"/> Non                                                                                                                                                            |
| Si oui, combien de jours                                                                                                                                                                                                |                                                                                                                                                                                                                |
| - des courbatures :                                                                                                                                                                                                     | <input type="radio"/> Oui <input type="radio"/> Non                                                                                                                                                            |
| Si oui, combien de jours                                                                                                                                                                                                |                                                                                                                                                                                                                |
| - des frissons :                                                                                                                                                                                                        | <input type="radio"/> Oui <input type="radio"/> Non                                                                                                                                                            |
| Si oui, combien de jours                                                                                                                                                                                                |                                                                                                                                                                                                                |
| - des sueurs importantes :                                                                                                                                                                                              | <input type="radio"/> Oui <input type="radio"/> Non                                                                                                                                                            |
| Si oui, combien de jours                                                                                                                                                                                                |                                                                                                                                                                                                                |
| - des céphalées:                                                                                                                                                                                                        | <input type="radio"/> Oui <input type="radio"/> Non                                                                                                                                                            |
| Si oui, combien de jours                                                                                                                                                                                                |                                                                                                                                                                                                                |
| -perte de l'odorat (anosmie)                                                                                                                                                                                            | <input type="radio"/> Oui <input type="radio"/> Non                                                                                                                                                            |
| Si oui, combien de jours                                                                                                                                                                                                |                                                                                                                                                                                                                |
| -perte du goût (agueusie)                                                                                                                                                                                               | <input type="radio"/> Oui <input type="radio"/> Non                                                                                                                                                            |
| Si oui, combien de jours                                                                                                                                                                                                |                                                                                                                                                                                                                |
| 3 - Si vous avez répondu OUI à une des questions précédentes, avez-vous eu :                                                                                                                                            |                                                                                                                                                                                                                |
| - signes respiratoires : toux, douleur de gorge, expectoration, dyspnée                                                                                                                                                 | <input type="radio"/> Oui <input type="radio"/> Non                                                                                                                                                            |
| - signes digestifs : nausées, vomissements, diarrhée, douleur abdominale                                                                                                                                                | <input type="radio"/> Oui <input type="radio"/> Non                                                                                                                                                            |
| 4 - Si vous avez répondu OUI à l'une des questions précédentes (2 ou 3), avez-vous dû être arrêté pour ces symptômes ?                                                                                                  | <input type="radio"/> Oui <input type="radio"/> Non                                                                                                                                                            |
| Si oui, combien de jours                                                                                                                                                                                                |                                                                                                                                                                                                                |
| 5 - Si vous avez répondu OUI à l'une des questions précédentes avez-vous dû être hospitalisé pour ces symptômes ?                                                                                                       | <input type="radio"/> Oui <input type="radio"/> Non                                                                                                                                                            |
| Si oui, combien de jours                                                                                                                                                                                                |                                                                                                                                                                                                                |
| 6 - Un diagnostic a-t-il été posé ?                                                                                                                                                                                     | <input type="radio"/> Oui <input type="radio"/> Non                                                                                                                                                            |
| Si oui, lequel ?                                                                                                                                                                                                        | .....                                                                                                                                                                                                          |
| 7 - Avez-vous été en contact avec un cas documenté ?                                                                                                                                                                    | <input type="radio"/> Oui <input type="radio"/> Non                                                                                                                                                            |
| 8- Quel est votre moyen de transport régulier pour venir au travail ?                                                                                                                                                   | <input type="checkbox"/> Véhicule personnel<br><input type="checkbox"/> Transport en commun<br><input type="checkbox"/> A pied<br><input type="checkbox"/> Vélo/trottinette<br><input type="checkbox"/> Autres |
| Préciser                                                                                                                                                                                                                | .....                                                                                                                                                                                                          |
| Préciser                                                                                                                                                                                                                | <input type="radio"/> Personnel <input type="radio"/> Libre-service                                                                                                                                            |

|                                                                                                                                                                                                                         |                                                                                                                                                                                                                |
|-------------------------------------------------------------------------------------------------------------------------------------------------------------------------------------------------------------------------|----------------------------------------------------------------------------------------------------------------------------------------------------------------------------------------------------------------|
| Semaine12                                                                                                                                                                                                               |                                                                                                                                                                                                                |
| Date d'évaluation                                                                                                                                                                                                       | /         /                                                                                                                                                                                                    |
| Si vous ressentez, de manière significative (=entraînant une atteinte/un changement de votre qualité de vie), un des symptômes suivants,merci de contacter le PM référent. Merci de répondre aux 8 questions suivantes. |                                                                                                                                                                                                                |
| 1-Au cours de la semaine précédente, avez-vous été absent?                                                                                                                                                              | <input type="radio"/> Oui <input type="radio"/> Non                                                                                                                                                            |
| Si oui, combien de jours                                                                                                                                                                                                |                                                                                                                                                                                                                |
| 2 - Au cours de la semaine, avez-vous eu :                                                                                                                                                                              |                                                                                                                                                                                                                |
| - de la fièvre (>38°C) :                                                                                                                                                                                                | <input type="radio"/> Oui <input type="radio"/> Non                                                                                                                                                            |
| Si oui, combien de jours                                                                                                                                                                                                |                                                                                                                                                                                                                |
| - des courbatures :                                                                                                                                                                                                     | <input type="radio"/> Oui <input type="radio"/> Non                                                                                                                                                            |
| Si oui, combien de jours                                                                                                                                                                                                |                                                                                                                                                                                                                |
| - des frissons :                                                                                                                                                                                                        | <input type="radio"/> Oui <input type="radio"/> Non                                                                                                                                                            |
| Si oui, combien de jours                                                                                                                                                                                                |                                                                                                                                                                                                                |
| - des sueurs importantes :                                                                                                                                                                                              | <input type="radio"/> Oui <input type="radio"/> Non                                                                                                                                                            |
| Si oui, combien de jours                                                                                                                                                                                                |                                                                                                                                                                                                                |
| - des céphalées:                                                                                                                                                                                                        | <input type="radio"/> Oui <input type="radio"/> Non                                                                                                                                                            |
| Si oui, combien de jours                                                                                                                                                                                                |                                                                                                                                                                                                                |
| -perte de l'odorat (anosmie)                                                                                                                                                                                            | <input type="radio"/> Oui <input type="radio"/> Non                                                                                                                                                            |
| Si oui, combien de jours                                                                                                                                                                                                |                                                                                                                                                                                                                |
| -perte du goût (agueusie)                                                                                                                                                                                               | <input type="radio"/> Oui <input type="radio"/> Non                                                                                                                                                            |
| Si oui, combien de jours                                                                                                                                                                                                |                                                                                                                                                                                                                |
| 3 - Si vous avez répondu OUI à une des questions précédentes, avez-vous eu :                                                                                                                                            |                                                                                                                                                                                                                |
| - signes respiratoires : toux, douleur de gorge, expectoration, dyspnée                                                                                                                                                 | <input type="radio"/> Oui <input type="radio"/> Non                                                                                                                                                            |
| - signes digestifs : nausées, vomissements, diarrhée, douleur abdominale                                                                                                                                                | <input type="radio"/> Oui <input type="radio"/> Non                                                                                                                                                            |
| 4 - Si vous avez répondu OUI à l'une des questions précédentes (2 ou 3), avez-vous dû être arrêté pour ces symptômes ?                                                                                                  | <input type="radio"/> Oui <input type="radio"/> Non                                                                                                                                                            |
| Si oui, combien de jours                                                                                                                                                                                                |                                                                                                                                                                                                                |
| 5 - Si vous avez répondu OUI à l'une des questions précédentes avez-vous dû être hospitalisé pour ces symptômes ?                                                                                                       | <input type="radio"/> Oui <input type="radio"/> Non                                                                                                                                                            |
| Si oui, combien de jours                                                                                                                                                                                                |                                                                                                                                                                                                                |
| 6 - Un diagnostic a-t-il été posé ?                                                                                                                                                                                     | <input type="radio"/> Oui <input type="radio"/> Non                                                                                                                                                            |
| Si oui, lequel ?                                                                                                                                                                                                        | .....                                                                                                                                                                                                          |
| 7 - Avez-vous été en contact avec un cas documenté ?                                                                                                                                                                    | <input type="radio"/> Oui <input type="radio"/> Non                                                                                                                                                            |
| 8- Quel est votre moyen de transport régulier pour venir au travail ?                                                                                                                                                   | <input type="checkbox"/> Véhicule personnel<br><input type="checkbox"/> Transport en commun<br><input type="checkbox"/> A pied<br><input type="checkbox"/> Vélo/trottinette<br><input type="checkbox"/> Autres |
| Préciser                                                                                                                                                                                                                | .....                                                                                                                                                                                                          |
| Préciser                                                                                                                                                                                                                | <input type="radio"/> Personnel <input type="radio"/> Libre-service                                                                                                                                            |
